# Supplementary material
Source: publisher figshare collection journal article supplement (https://acs.figshare.com/ndownloader/files/15462113)
Supplement: Supplementary file 1 [file 15462113]

## Simply mixing poly-protein G with detection antibodies enhances the detection limit and sensitivity of immunoassays

Yi-Jou Chen<sup>†</sup>, Michael Chen<sup>†</sup>, Tian-Lu Cheng<sup>‡, ⊥</sup>, Steve R. Roffler<sup>○</sup>, Shyr-Yi Lin<sup>€</sup>, <sup>‡, ⊂</sup>, Hui-Lan Hsu<sup>§</sup>, Chang-Hung Wang<sup>†</sup>, Che-Yi Chen<sup>†</sup>, An-Pei Kao<sup>‡</sup>, Jing-Jy Cheng<sup>†, ∞</sup>, Kuo-Hsiang Chuang<sup>†, §, #, Δ, \*</sup>

<sup>†</sup> Ph.D. Program in Clinical Drug Development of Herbal Medicine, Taipei Medical University, Taipei, Taiwan

<sup>‡</sup> Center for Biomarkers and Biotech Drugs, Kaohsiung Medical University, Kaohsiung, Taiwan.

<sup>⊥</sup> Department of Biomedical Science and Environmental Biology, Kaohsiung Medical University, Kaohsiung, Taiwan.

<sup>○</sup> Institute of Biomedical Sciences, Academia Sinica, Taipei, Taiwan

<sup>€</sup> Department of Primary Care Medicine, Taipei Medical University Hospital, Taipei, Taiwan

<sup>‡</sup> Department of General Medicine, School of Medicine, College of Medicine, Taipei Medical University, Taipei, Taiwan,

<sup>⊂</sup> TMU Research Center of Cancer Translational Medicine, Taipei Medical University, Taipei, Taiwan, ROC;

<sup>§</sup> Graduate Institute of Pharmacognosy, Taipei Medical University, Taipei, Taiwan

<sup>‡</sup> Stemforce Biotechnology Co., Ltd, Chiayi City, Taiwan

<sup>∞</sup> National Research Institute of Chinese Medicine, Ministry of Health and Welfare, Taipei, Taiwan.

<sup>#</sup> Ph.D. Program in Biotechnology Research and Development, Taipei Medical University, Taipei, Taiwan

<sup>Δ</sup> Traditional Herbal Medicine Research Center of Taipei Medical University Hospital, Taipei Medical University, Taipei, Taiwan

**\* Corresponding Author**

Dr. Kuo-Hsiang Chuang, Graduate Institute of Pharmacognosy, Taipei Medical University, 250 Wu-Hsing Street, Taipei, TAIWAN

Phone: 886-2-27361663-6163, E-mail: [khchuang@tmu.edu.tw](mailto:khchuang@tmu.edu.tw)

## **Table of Contents**

### **Experimental section**

The interference of bovine serum albumin (BSA) and bovine calf serum (BCS) blocking solutions on 8pG based ELISA.

**Figure S1.** The interference of blocking reagents for the sensitivity and background value of 8pG based ELISAs

**Figure S2.** Models of antibody/8pG complexes “standing upright” or “lying down” on (A) high density or (B) low density antigens.

**Figure S3.** The raw images of Western blot data in the presence and absence of 8pG.

## Experimental section

**The interference of bovine serum albumin (BSA) and bovine calf serum (BCS) blocking solutions on 8pG based ELISA.** The PEG<sub>5K</sub>-NH<sub>2</sub> serially diluted (0.69, 2, 6.2, 18.5, 55.5, 166 and 500 ng/well) in coating buffer (0.1 M NaHCO<sub>3</sub>, pH = 9) was coated in Maxisorp 96-well microplates for 2 hours at 37 °C. The microplates were blocked with 3% (w/v) BSA or 3% (w/v) BCS in PBS overnight at 4 °C. Biotin-conjugated anti-PEG antibodies (2 µg/mL of 3.3-biotin) were mixed individually by a 1:1 volume ratio with 8pG at room temperature for 2 hours (the final concentrations of 3.3-biotin was 1 µg/mL). The 8pG/3.3-biotin mixtures were added to microplates and incubated at room temperature for 1 hour. After washing the microplates, streptavidin-HRP and ABTS were sequentially added and incubated in the microplates to detect PEG<sub>5K</sub>-NH<sub>2</sub>. Color development was measured at 405 nm by a microplate reader.

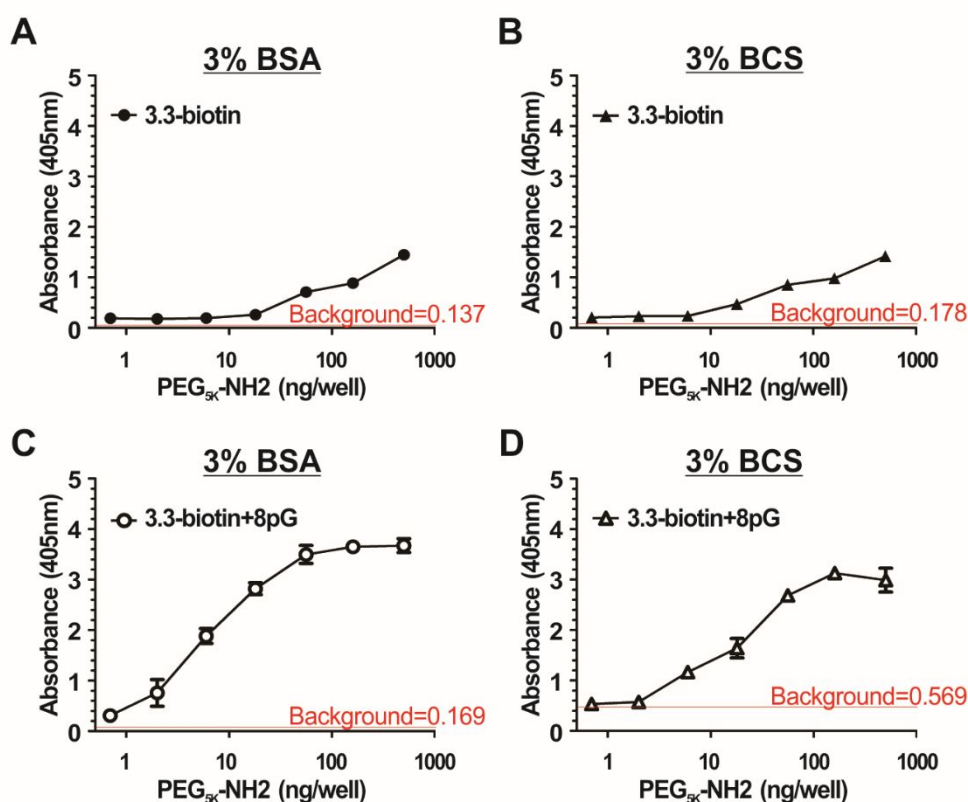

**Figure S1. The interference of blocking reagents for the sensitivity and background value of 8pG based ELISAs.** The microplates coated with different amount of PEG<sub>5K</sub>-NH<sub>2</sub> (0.69, 2, 6.2, 18.5, 55.5, 166 and 500 ng/well) were blocked by (A)(C) 3% (w/v) BSA and (B)(D) 3% (w/v) BCS, respectively. Biotin-conjugated anti-PEG antibody (termed 3.3-biotin, 1 µg/mL) mixing with or without 8pG was added to these microplates, followed by the sequential addition of streptavidin-HRP and ABTS substrate. The representative data from three independent experiments are shown. The red line indicates the background value of each group. Bar, SD.

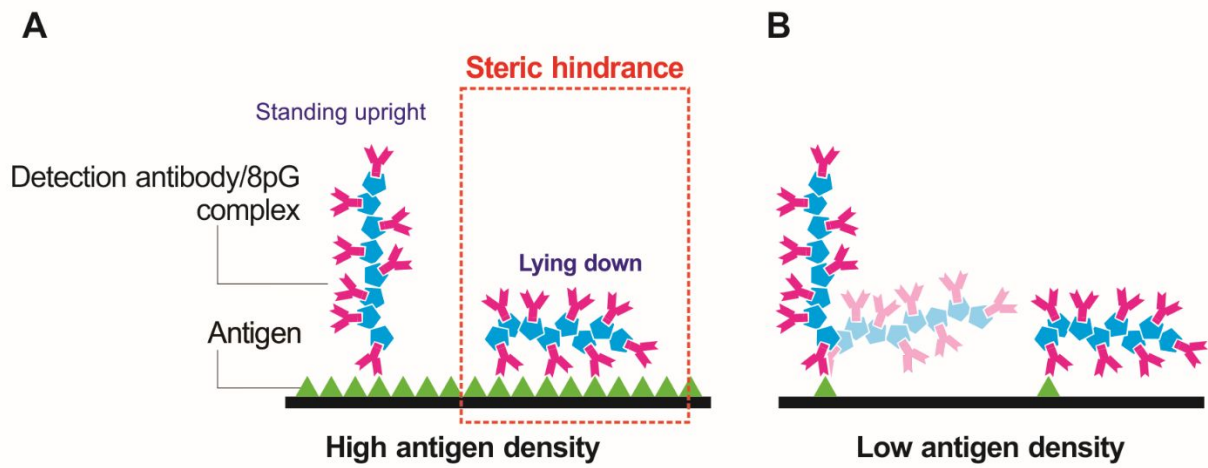

**Figure S2. Models of antibody/8pG complexes “standing upright” or “lying down” on (A) high density or (B) low density antigens.**

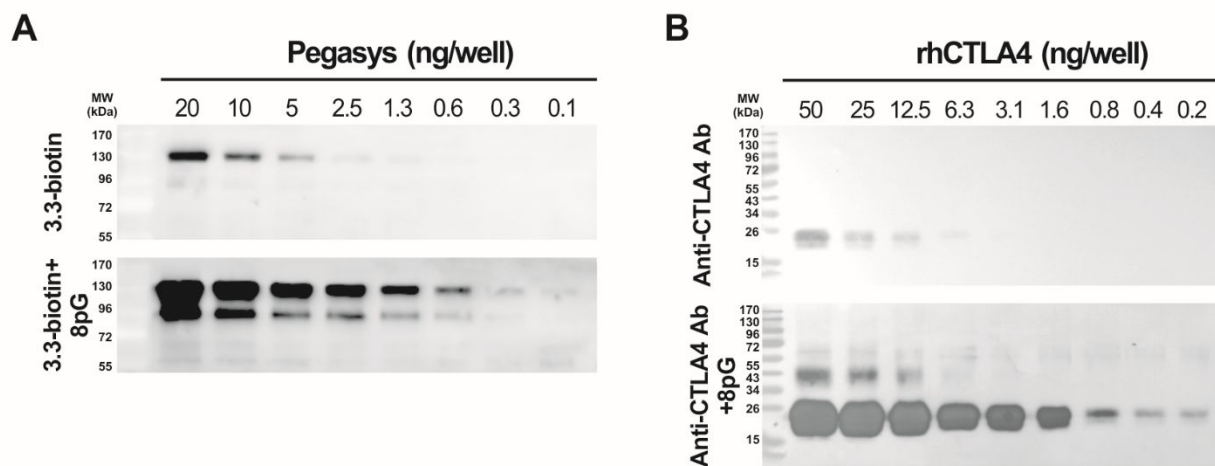

**Figure S3. The raw images of Western blot data performed in the presence and absence of 8pG.** Serial diluted (A) Pegasys and (B) rhCTLA4 were electrophoresed on a 10% reducing SDS PAGE, transferred to nitrocellulose membrane, and probed with 3.3-biotin or anti-CTLA4 antibody which were mixed with or without 8pG as described in Materials and Methods section.
